# Supplementary material for: The crystal and molecular structure of (R)-sirtinol – C26H22N2O2 – a chemo-sensitive enhancer and ligand in metal complexes with important bio-inorganic applications
Source: publisher site journal article supplement (doi:10.1515/zkri-2024-0073), 2024-07-23
Supplement: Supplementary file 1 [file j_zkri-2024-0073_suppl_001.docx]

**Supporting Information.**

NMR structure assignments

**1H NMR**

1H NMR (600 MHz, cdcl3) δ 14.23 (s, 1H), 9.36 (s, 1H), 8.11 (d, *J* = 8.4 Hz, 1H), 7.91 (dd, *J* = 7.8, 1.6 Hz, 1H), 7.89 (d, *J* = 9.0 Hz, 1H), 7.78 (dd, *J* = 7.9, 1.3 Hz, 1H), 7.54 (qd, *J* = 7.2, 1.5 Hz, 2H), 7.39 (ddd, *J* = 8.0, 6.9, 1.0 Hz, 1H), 7.34 (td, *J* = 7.6, 1.1 Hz, 1H), 7.32 – 7.27 (m, 2H), 7.21 (dd, *J* = 7.9, 1.1 Hz, 1H), 7.16 – 7.07 (m, 2H), 6.75 (d, *J* = 7.6 Hz, 1H), 5.30 (p, *J* = 7.0 Hz, 1H), 1.54 (d, *J* = 6.9 Hz, 3H).

**13C NMR**

13C NMR (151 MHz, cdcl3) δ 165.92, 165.87, 159.55, 146.46, 143.12, 136.70, 133.12, 132.09, 130.11, 129.53, 128.89, 128.72, 128.58, 128.43, 127.93, 127.42, 126.60, 126.33, 126.26, 124.05, 120.80, 120.28, 119.46, 109.60, 49.93, 31.11, 21.96.

**COSY**

**HSQC**

**HMBC**

**NOESY**

**Low-T 1H NMR**

**Low-T COSY**

**Table T1 Assignments Table**

| **No** | **Atom Type** | **δ H (Multiplicity, *J*, nH)** | **δ C** | **HSQC-EDITED** | **HMBC** | **COSY** | **NOESY** |
| --- | --- | --- | --- | --- | --- | --- | --- |
| H2 | H | 14.22 | - | - | - | - | - |
| H8 | H | 9.36 (s, 1H) | - | CC8(159.4) | CC2(146.5), CC7(120.8), CC9(133.1), CC18(109.7) | - | HH17(8.11) |
| H17 | H | 8.11 (d, 8.4 Hz, 1H) | - | CC17(119.4) | CC18(109.7), CC15(128.0) | HH16(7.53), HH15(7.53) | HH8(9.36) |
| H3 | H | 7.91 (dd, 7.8,1.6 Hz, 1H) | - | - | CC2(146.5) | HH4(7.35), HH3(7.91) | - |
| H11 | H | 7.89 (d, 9.0 Hz, 1H) | - | CC11(136.6) | CC9(133.1), CC13(130.0) | - | - |
| H6 | H | 7.78 (dd, 7.9,1.3 Hz, 1H) | - | CC6(129.4) | - | HH5(7.40), HH6(7.78) | - |
| H16 | H | 7.53 | - | CC16(132.1) | CC13(130.0) | HH17(8.11), HH14(7.21) | - |
| H15 | H | 7.53 | - | CC15(128.0) | CC13(130.0) | HH17(8.11), HH14(7.21) | - |
| H5 | H | 7.40 | - | CC5(123.9) | - | HH5(7.40), HH6(7.78) | - |
| H26 | H | 7.35 | - | CC26(126.4) | - | - | - |
| H4 | H | 7.35 | - | CC4(126.4) | CC2(146.5) | HH3(7.91) | - |
| H22 | H | 7.29 (m, 1H) | - | - | CC19(49.9) | HH24(7.14) | - |
| H23 | H | 7.21 (dd, 7.9,1.1 Hz, 1H) | - | - | CC25(128.6) | - | - |
| H14 | H | 7.21 (dd, 7.9,1.1 Hz, 1H) | - | CC14(120.2) | - | HH16(7.53), HH15(7.53) | - |
| H12 | H | 7.17 | - | - | - | - | - |
| H25 | H | 7.14 (m, 1H) | - | CC25(128.6), CC23(128.6) | CC21(143.2) | - | - |
| H24 | H | 7.14 (m, 1H) | - | CC24(127.4) | CC21(143.2) | HH22(7.29) | - |
| H1 | H | 6.76 | - | - | - | HH19(5.31), HH1(6.76) | - |
| H19 | H | 5.31 | - | CC19(49.9) | CC26(126.4), CC21(143.2), CC22(126.3), CC1(165.9) | HH19(5.31), HH20c(1.54), HH20b(1.54), HH20a(1.54), HH1(6.76) | - |
| H20c | H | 1.54 (d, 6.9 Hz, 1H) | - | CC20(22.0) | CC21(143.2), CC19(49.9) | HH19(5.31), HH20b(1.54), HH20a(1.54) | - |
| H20b | H | 1.54 (d, 6.9 Hz, 1H) | - | CC20(22.0) | CC21(143.2), CC19(49.9) | HH19(5.31), HH20c(1.54), HH20a(1.54) | - |
| H20a | H | 1.54 (d, 6.9 Hz, 1H) | - | CC20(22.0) | CC21(143.2), CC19(49.9) | HH19(5.31), HH20c(1.54), HH20b(1.54) | - |
| C26 | CH | - | 126.4 | HH26(7.35) | HH19(5.31) | - | - |
| C21 | C | - | 143.2 | - | HH25(7.14), HH24(7.14), HH19(5.31), HH20c(1.54), HH20b(1.54), HH20a(1.54) | - | - |
| C25 | CH | - | 128.6 | HH25(7.14) | HH23(7.21) | - | - |
| C22 | CH | - | 126.3 | - | HH19(5.31) | - | - |
| C24 | CH | - | 127.4 | HH24(7.14) | - | - | - |
| C23 | CH | - | 128.6 | HH25(7.14) | - | - | - |
| C19 | CH | - | 49.9 | HH19(5.31) | HH22(7.29), HH20c(1.54), HH20b(1.54), HH20a(1.54) | - | - |
| C20 | CH3 | - | 22.0 | HH20c(1.54), HH20b(1.54), HH20a(1.54) | - | - | - |
| N1 | NH | - | - | - | - | - | - |
| C1 | C | - | 165.9 | - | HH19(5.31) | - | - |
| 11 | O | - | - | - | - | - | - |
| C2 | C | - | 146.5 | - | HH4(7.35), HH3(7.91), HH8(9.36) | - | - |
| C5 | CH | - | 123.9 | HH5(7.40) | - | - | - |
| C6 | CH | - | 129.4 | HH6(7.78) | - | - | - |
| C4 | CH | - | 126.4 | HH4(7.35) | - | - | - |
| C7 | C | - | 120.8 | - | HH8(9.36) | - | - |
| C3 | CH | - | 126.4 | - | - | - | - |
| N2 | NH | - | - | - | - | - | - |
| C8 | CH | - | 159.4 | HH8(9.36) | - | - | - |
| C9 | C | - | 133.1 | - | HH8(9.36), HH11(7.89) | - | - |
| C18 | C | - | 109.7 | - | HH8(9.36), HH17(8.11) | - | - |
| C13 | C | - | 130.0 | - | HH11(7.89), HH16(7.53), HH15(7.53) | - | - |
| C12 | CH | - | 120.8 | - | - | - | - |
| C10 | C | - | 165.9 | - | - | - | - |
| C11 | CH | - | 136.6 | HH11(7.89) | - | - | - |
| C17 | CH | - | 119.4 | HH17(8.11) | - | - | - |
| C16 | CH | - | 132.1 | HH16(7.53) | - | - | - |
| C14 | CH | - | 120.2 | HH14(7.21) | - | - | - |
| C15 | CH | - | 128.0 | HH15(7.53) | HH17(8.11) | - | - |
| 30 | O | - | - | - | - | - | - |

**NOE Signal intensity**

r(CH-CH3) = 2.515 Å

| mixing time, s | NOE intensity (CH-CH3) | NOE intensity CH-NH40 | NOE intensity NH45-CH46 | r(CHNH), Å | r(OHC45H), Å |
| --- | --- | --- | --- | --- | --- |
| 0.2 | -0.0089 | -0.0009 | 0 | 3.64 | - |
| 0.3 | -0.0139 | -0.0020 | -0.0054 | 3.47 | 2.93 |
| 0.4 | -0.0158 | -0.0040 | -0.0018 | 3.16 | 3.61 |
| 0.5 | -0.0206 | -0.0041 | -0.0055 | 3.29 | 3.13 |
| 0.6 | -0.0235 | -0.0043 | -0.0035 | 3.34 | 3.45 |
| 0.7 | -0.0262 | -0.0065 | -0.0080 | 3.18 | 3.07 |
|  |  |  | r(avg) | 3.34 | 3.18 |
|  |  |  | std | 0.18 | 0.28 |

**Figure S1:**


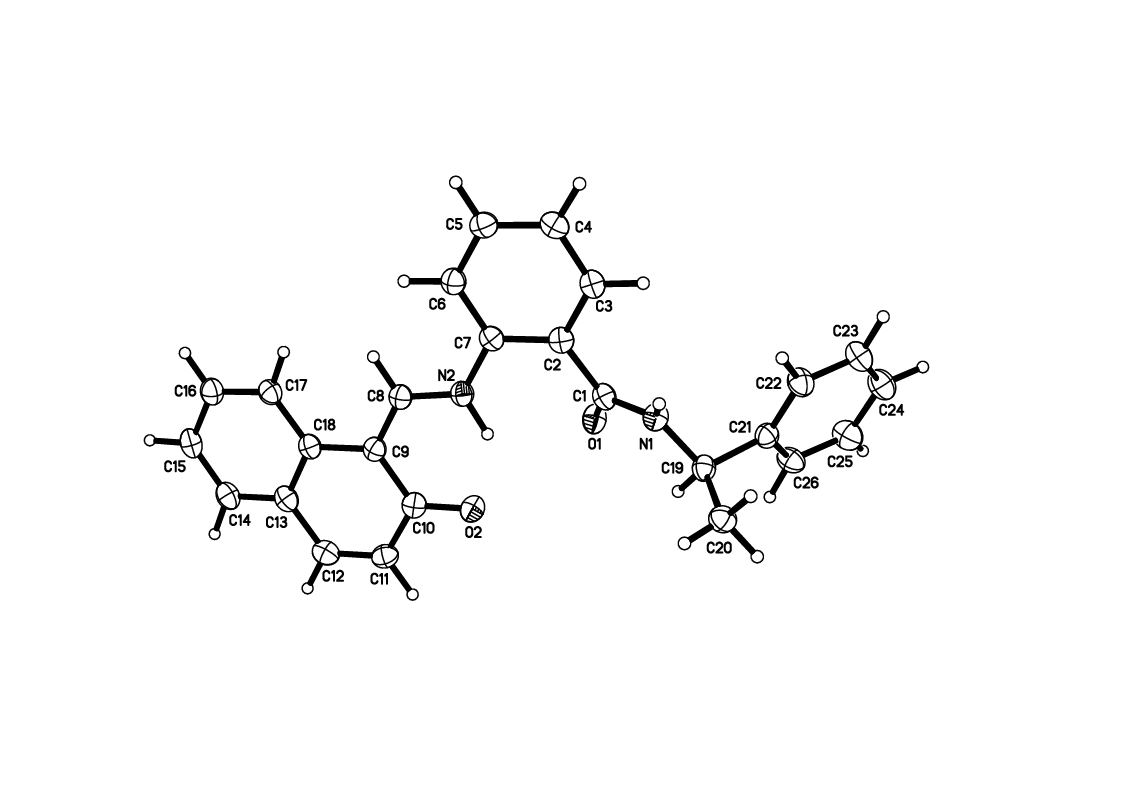


The molecule (R)-sirtinol with its numbering scheme (**I**). The atoms have been plotted at 40% anisotropic displacement.

**Table T2: π-π Interactions in (R)-sirtinol (I)**

A) Distances between phenyl ring (C2-C7) and the 6-membered planar ring containing the N-H and the O (H2, N2, C8 C9 C10, O2).

C4-N2A 3.547(4) Å C5-C8A 3.526(4) Å

C6-C9A 3.576(4) Å C7-C10A 3.743(4) Å

C8-C12A 3.714(4) Å C2-O2A 3.767(4) Å

N2-C11A 3.775(4) Å

Symmetry for the “A” atoms = x-1, y, z

The centroid-to-centroid distance of the above planes is 3.595 Å.

B) Distances between phenyl ring (C2-C7) and the naphthalene ring (C9A-C18A) from adjacent molecule:

C2-C11A 4.428(4) Å C3-C10A 4.332(4) Å

C4-C9A 4.236(4) Å C5-C18A 4.173(4) Å

C6-C13A 4.248(4) Å C7-C12A 4.353(4) Å

Symmetry for the “A” atoms = x-1, y, z

The centroid-to-centroid distance of the above planes is 4.293 Å.

C) Distances between phenyl (C21-C26) and phenyl (C21A-C26A, by symmetry) interaction

= 5.155 Å (one cell apart in the *a* dimension).

D) Distances between naphthalene (C9-C18) and naphthalene (C9A-C18A, by symmetry) interactions:

C9-C17A 4.893(4) Å C10-C18A 5.025(4) Å

C11-C13A 5.019(4) Å C12-C14A 4.924(5) Å

C13-C15A 4.851(5) Å C18-C16A 4.846(5) Å

Symmetry for the “A” atoms = x-1, y, z

The centroid-to-centroid distance of the above planes is 5.293 Å.
